# Supplementary material
Source: PubMed Central journal article supplement (PMC5462041)
Supplement: supp_pp.17.00269_PP2017-RA-00269DR1_Supplemental_Figure_1.pdf [file supp_pp.17.00269_PP2017-RA-00269DR1_Supplemental_Figure_1.pdf]

# Figure S1

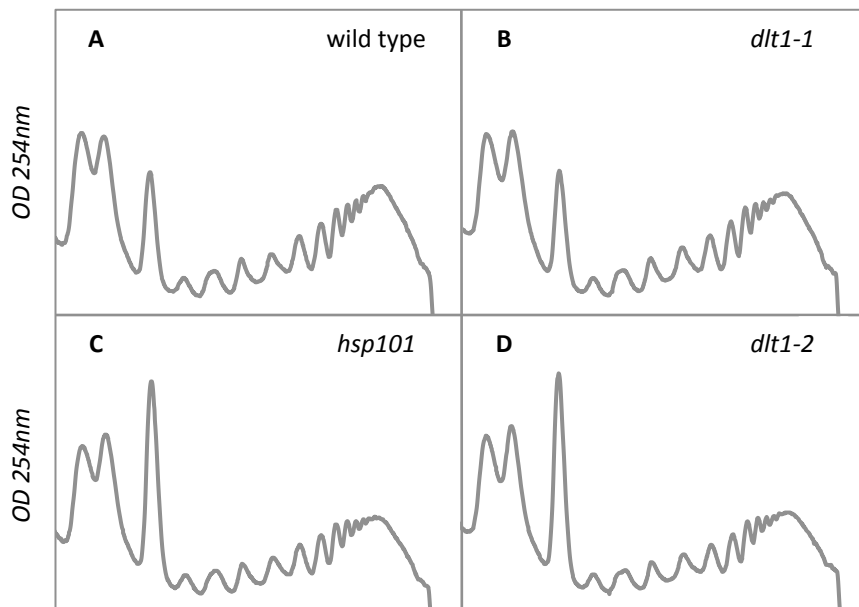

**Figure S1.** Polysome profiles after 2 h of recovery in wild type (A), *dlt1-1* (B), *hsp101* (C) and *dlt1-2* (D). Data correspond to the same biological repeats. *dlt1-1* is a missense mutant of HSP101 with little effect on HSP101 chaperone activity whereas *dlt1-2* is a missense of HSP101 that impairs HSP101 chaperone activity.
