# Supplementary material
Source: PubMed Central journal article supplement (PMC5462041)
Supplement: supp_pp.17.00269_PP2017-RA-00269DR1_Supplemental_Figure_2.pdf [file supp_pp.17.00269_PP2017-RA-00269DR1_Supplemental_Figure_2.pdf]

# Figure S2

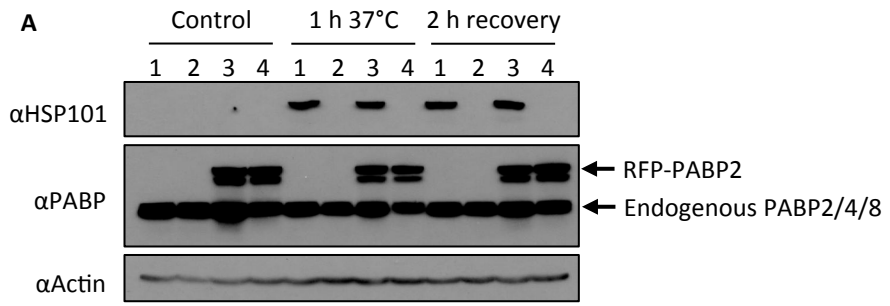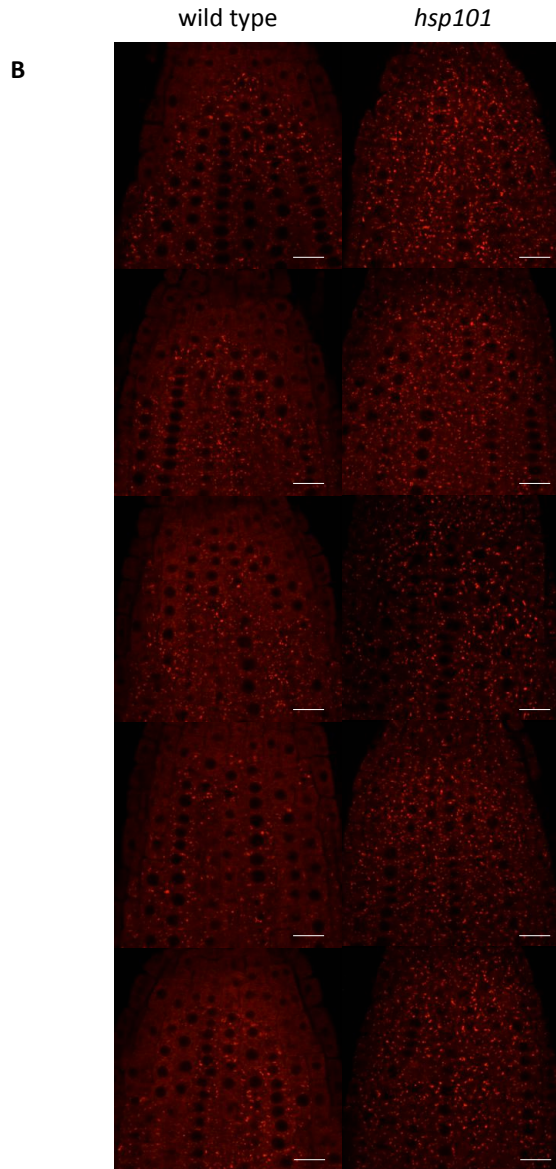

**Figure S2. A.** Western blot analysis of RFP-PABP2 lines. Levels of HSP101, PABP, and ACTIN were checked using specific antibodies.  $\alpha$ PABP recognizes PABP2, PABP4, and PABP8 proteins. 1. wild type. 2. *hsp101*. 3. pPABP2-RFP-PABP2 in wild type. 4. pPABP2-RFP-PABP2 in *hsp101* background. **B.** Monitoring of SG formation using pPABP2-RFP-PABP2 in wild type or in *hsp101* background after 2 h recovery. 5 different roots are represented. White lines correspond to 10  $\mu$ m.
