# Supplementary material
Source: PubMed Central journal article supplement (PMC5462041)
Supplement: supp_pp.17.00269_PP2017-RA-00269DR1_Supplemental_Figure_3.pdf [file supp_pp.17.00269_PP2017-RA-00269DR1_Supplemental_Figure_3.pdf]

Figure S3

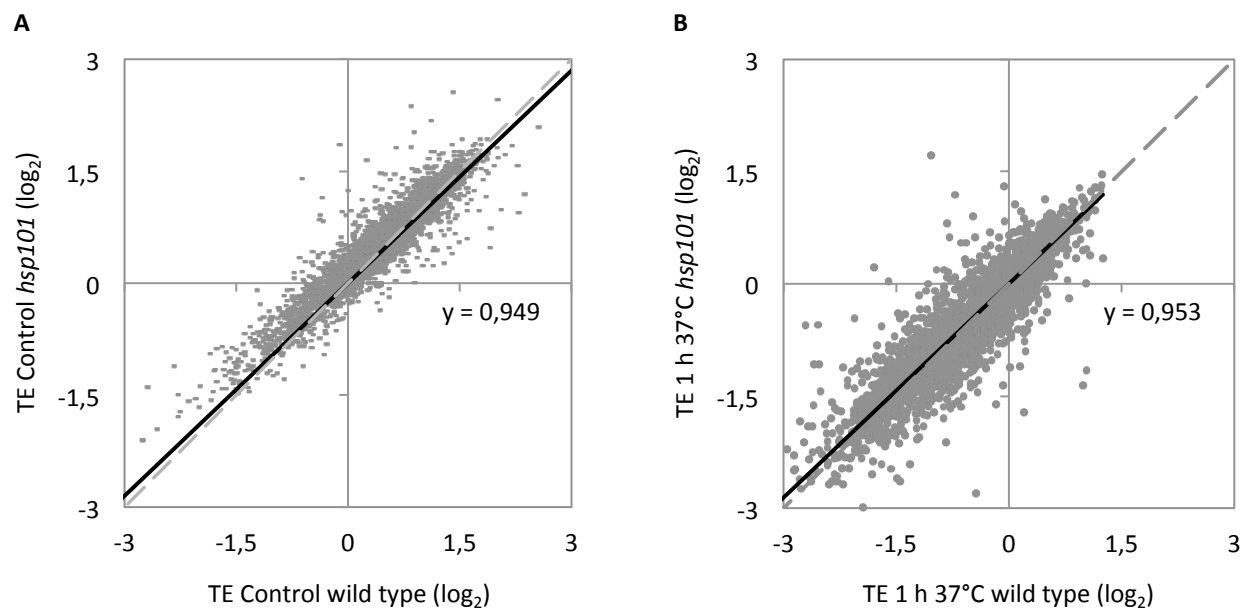

**Figure S3.** Log<sub>2</sub> value of the 3309 mRNAs in control (**A**) and after 1 h at 37°C (**B**) in wild type vs. *hsp101*.

Black line correspond to the linear regression of the gray dots.
