# Supplementary material
Source: PubMed Central journal article supplement (PMC5462041)
Supplement: supp_pp.17.00269_PP2017-RA-00269DR1_Supplemental_Figure_4.pdf [file supp_pp.17.00269_PP2017-RA-00269DR1_Supplemental_Figure_4.pdf]

Figure S4

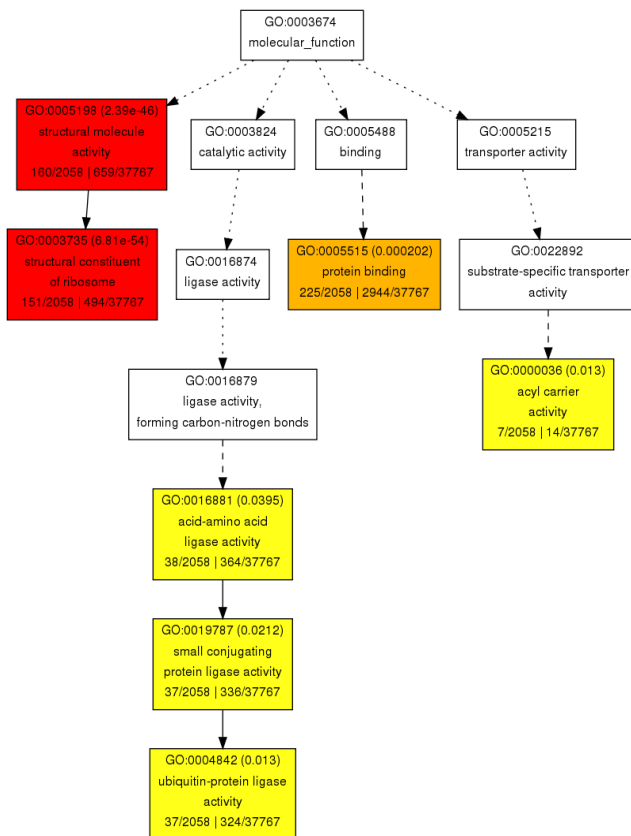

**Figure S4.** Gene Ontology (GO) analysis of mRNAs poorly translated during HS and affected in translation recovery in *hsp101* (2103/3309). GO groups highly enriched are presented in red. p-values are presented in parentheses for all groups.
