# Supplementary material
Source: PubMed Central journal article supplement (PMC5462041)
Supplement: supp_pp.17.00269_PP2017-RA-00269DR1_Supplemental_Figure_5.pdf [file supp_pp.17.00269_PP2017-RA-00269DR1_Supplemental_Figure_5.pdf]

Figure S5

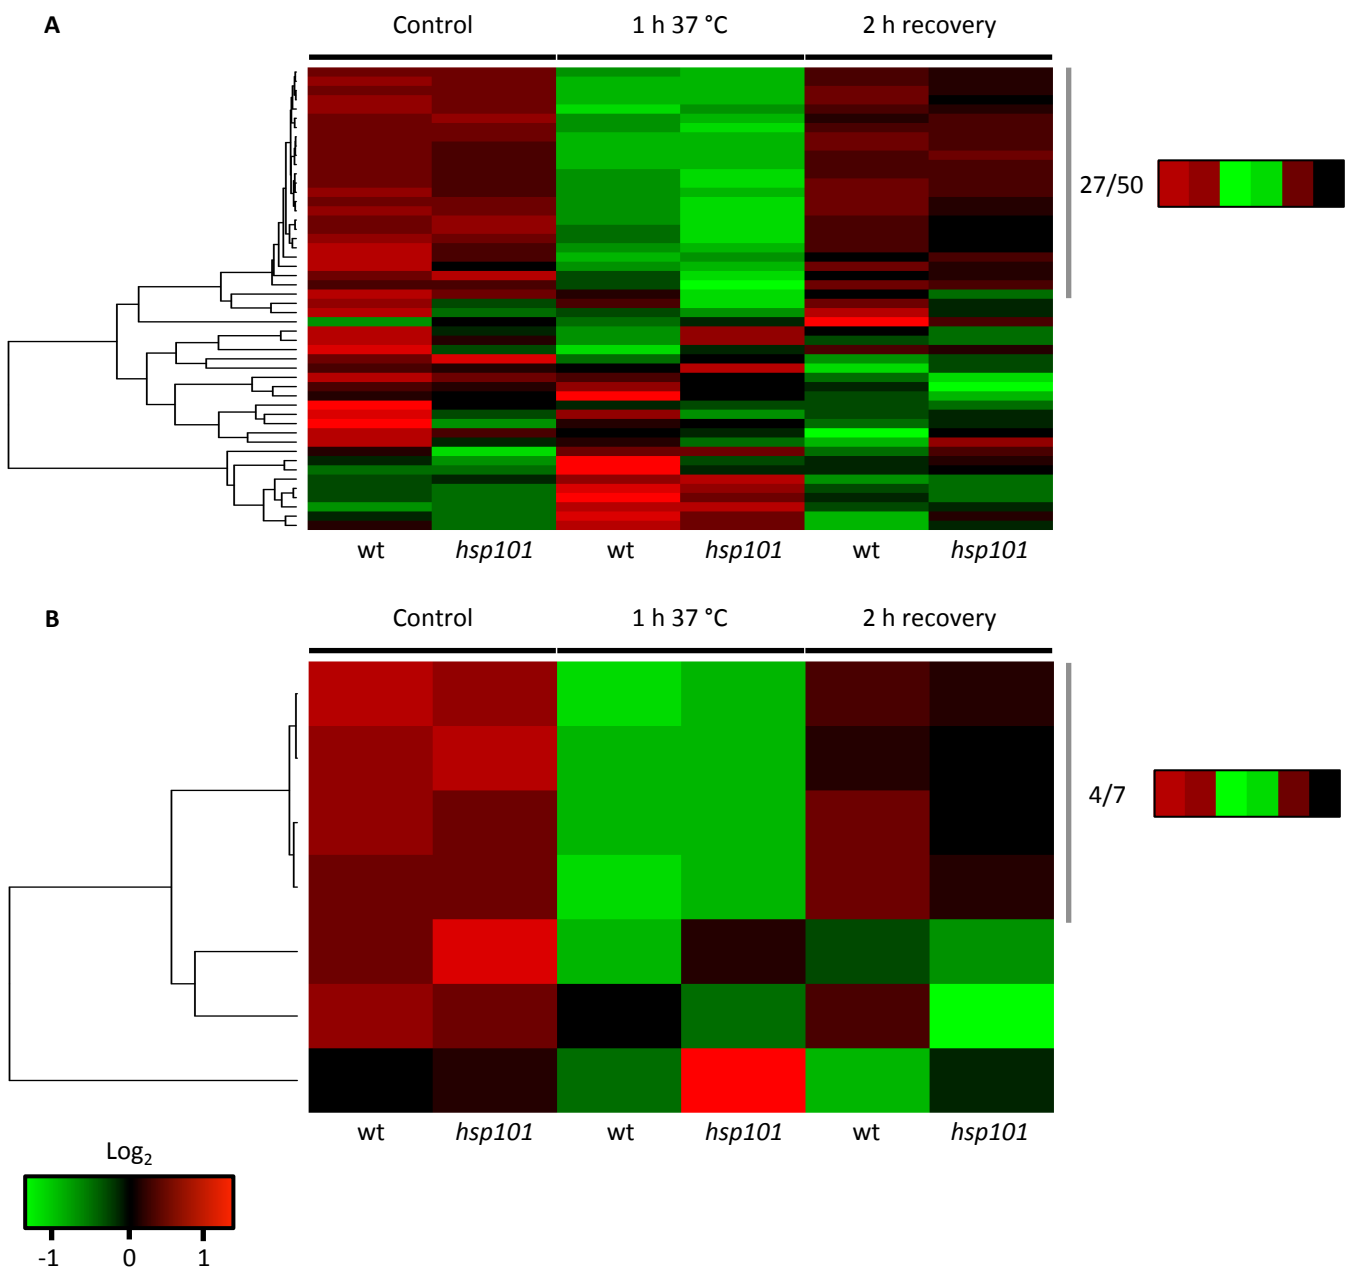

**Figure S5. Translation efficiency of chloroplasmic and mitochondrial RP mRNAs in wild type and *hsp101* under normal condition, after 1 h at 37°C and after 2 h recovery.** **A.** Heatmap of chloroplasmic RP mRNAs translation efficiency in log<sub>2</sub> value. The Heatmap was performed on the 50 chloroplasmic RP mRNAs identified in RNAseq database. 27 of them are grouped in the same cluster. The numbers of transcripts and the mean value of TE of this cluster are marked. **B.** Heatmap of mitochondrial RP mRNAs translation efficiency in log<sub>2</sub> value. The Heatmap was performed on the 7 mitochondrial RP mRNAs identified in RNAseq database. 4 of them are grouped in a same cluster. The number of transcripts and the mean value of TE of this cluster are marked.
