# Supplementary material
Source: PubMed Central journal article supplement (PMC5462041)
Supplement: supp_pp.17.00269_PP2017-RA-00269DR1_Supplemental_Figure_6.pdf [file supp_pp.17.00269_PP2017-RA-00269DR1_Supplemental_Figure_6.pdf]

## Figure S6

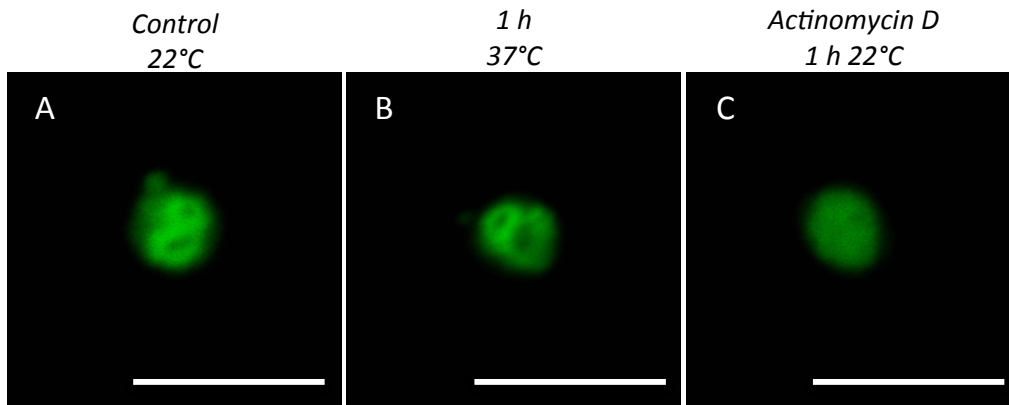

**Figure S6. Heat stress did not affect nucleoli architecture. A, B, C.** Confocal microscopy analysis of nucleoli architecture using FIB2-YFP in normal condition (A), after 1 h at 37°C (B), and after 1 h at 22°C in liquid medium supplemented with actinomycin D (C). White lines correspond to 10 μm. Pictures are representative of 25 nucleoli analyzed on 5 different seedlings (5 per seedlings) for each condition.
